# Supplementary material for: TERT Promoter Revertant Mutation Inhibits Melanoma Growth through Intrinsic Apoptosis
Source: MDPI journal article supplement (doi:10.3390/biology11010141), 2022-01-14
Supplement: s1 [file s1]

C T G C G c a c g t g g g a a g c c c t g g c c c c g g c c a c c c c c g c g a t g c c g c g c t c c c c g  
 E-box Start codon  
 C C C C T T C C T T T C C G C G G C C C C g C C C T C T C C T C G C G G C G C G A G T T T C A G G C A  
 -99  
 C G G C C C A G C C C C C T C C G G G C C C T C C C A G C C C C T C C C C T T C C T T T C C G C G G C C C C  
 -124  
 C C C C T C C C G G G T C C C C G G C C C A G C C C C C T C C G G G C C C T C C C A G C C C C T C C C C T  
 -146  
 G T G G C G G A G G G A C T G G G G A C C G G G G C A C C G T C C T G C C C C T T C A C C T T C C A G C  
 -243  
 C G C G G A C C C C G C C C C G T C C C G A C C C C T C C C G G G T C C C C G G C C C A G C C C C C T C C G G G C C C  
 C C C A G C C C C T C C C C T T C C T T T C C G C G G C C C C g C C C T C T C C T C G C G G C G C G A G T T T C A G G  
 A G C G C T G C G T C C T G C T G C G c a c g t g g g a a g C C C T G G C C C C G G C C A C C C C C G c g a t G C C G C  
 G C G C T C C C C G C T G C C G A G C C G T G C G C T C C C T G C T G C G C A G C C A C T A C C G C G A G G T G C T G C C G C T G G C C A C  
 C C C A G G G C T G G C G G C T G G T G A G C G C G G G G A C C C G G C G G C T T T C C G C G C G C T G G T G C C C A G T

**Figure S1.** Results of sanger sequencing of the TERT promoter of A375-146C/C. Sanger sequencing of A375-146C/C. Cells were transfected with a plasmid expressing sgRNA and SpCas9-NG. The DNA covering the most of the TERT promoter was analyzed by Sanger sequencing.

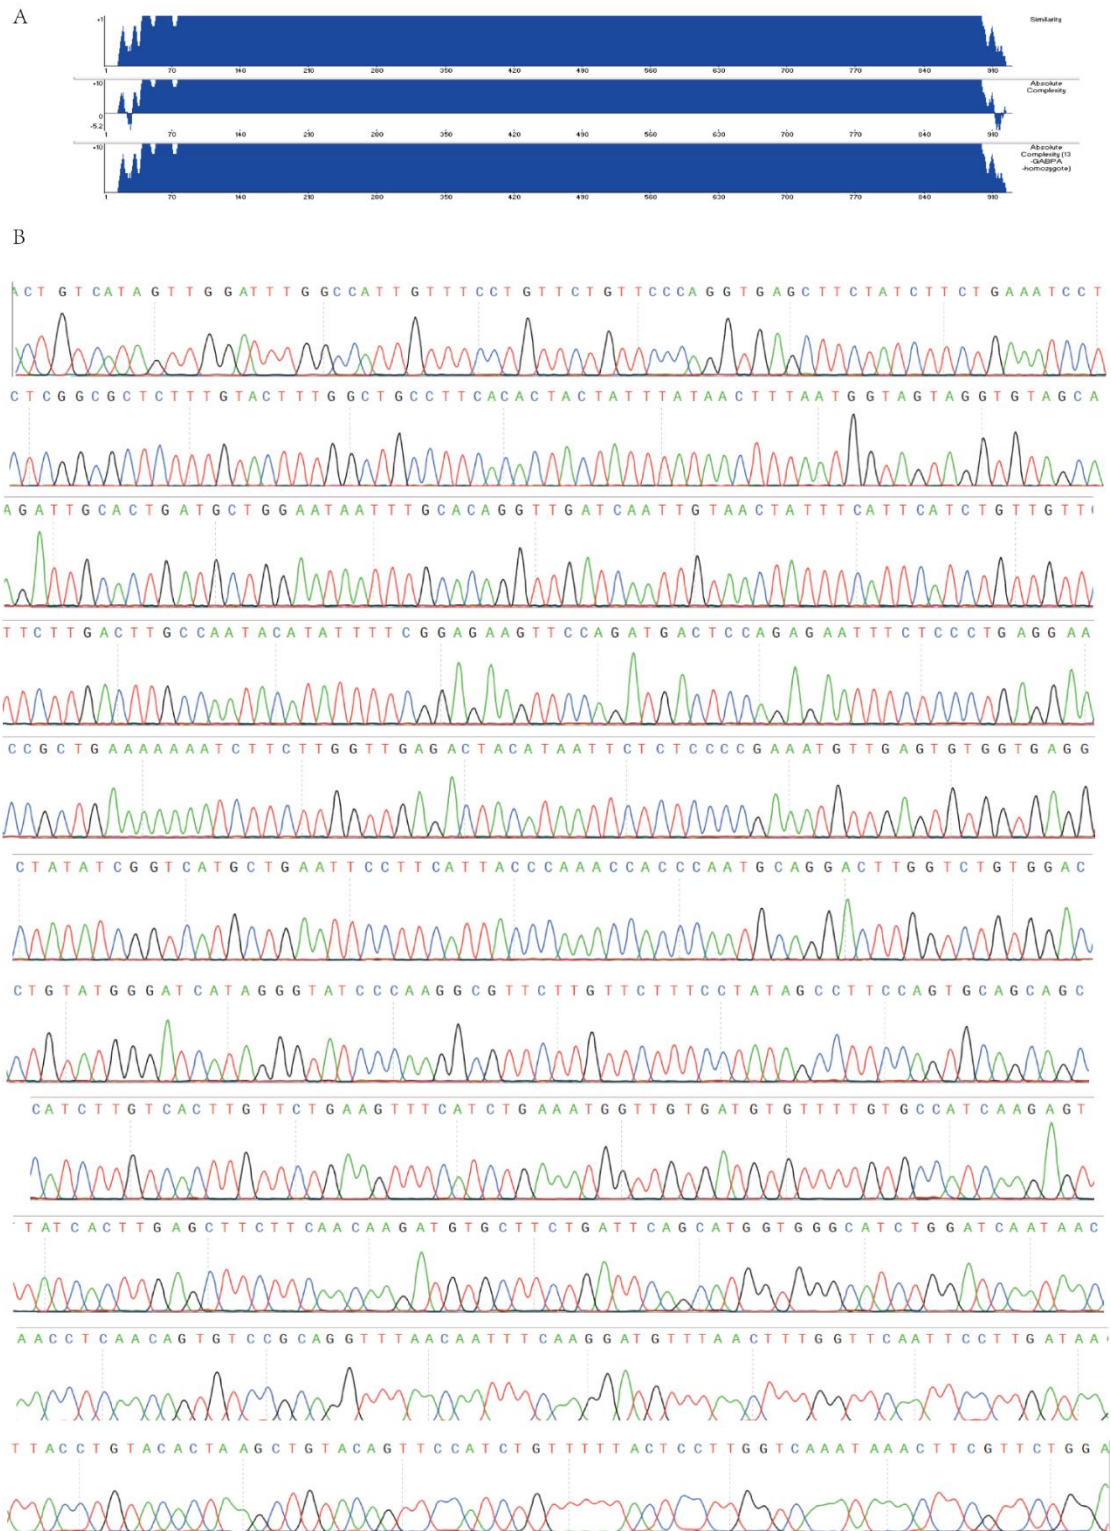

**Figure S2.** Results of sanger sequencing of GABPA of A375-146C/C. **(A)** Comparative analysis of GABPA sequencing results of A375-146T/T and A375-146C/C. The DNA covering coding region in GABPA was analyzed by Sanger sequencing. **(B)** Results of sanger sequencing of the GABPA of A375-146C/C.
